# Supplementary material for: Long-term deep-supercooling of large-volume water and red cell suspensions via surface sealing with immiscible liquids
Source: PubMed Central journal article supplement (PMC6086840; doi:10.1038/s41467-018-05636-0), 2018-08-10
Supplement: 41467_2018_5636_MOESM3_ESM.pdf [file 41467_2018_5636_MOESM3_ESM.pdf]

## Description of Additional Supplementary Files

### **File Name: Supplementary Movie 1**

**Description:** Ultrasonication for 1 ml DSC water sealed by MO. The water is supercooled at - 20 °C for 1 day and the ultrasonic frequency is 40 kHz.

### **File Name: Supplementary Movie 2**

**Description:** Ultrasonication for 1 ml DSC water sealed by undecane (C11). The water is supercooled at - 20 °C for 1 day and the ultrasonic frequency is 40 kHz.

### **File Name: Supplementary Movie 3**

**Description:** Ultrasonication for 1 ml DSC water sealed by 1-butanol (C4OH). The water is supercooled at - 20 °C for 1 day and the ultrasonic frequency is 40 kHz.
